# Supplementary material
Source: publisher site journal article supplement (https://www.dovepress.com/get_supplementary_file.php?f=supplementary_file_7_51969.pdf)
Supplement: Supplementary file 1 [file get_supplementary_file.php]

**Table S7. The significant difference in overall survival (p values < 0.05) in the resistant patient group**

|    | p-value   | UniqueID        | Overall survival ( Log-rank p < 0.05) |
|----|-----------|-----------------|---------------------------------------|
| 1  | 0.0017905 | hsa-miR-136     | 0.005                                 |
| 2  | 0.0019239 | hsa-miR-744     | 0.007                                 |
| 3  | 0.0030056 | hsa-miR-374b    | 0.029                                 |
| 4  | 0.0034771 | hsa-miR-28-5p   |                                       |
| 5  | 0.0049281 | hsa-miR-324-5p  | 0.004                                 |
| 6  | 0.0052473 | hsa-miR-127-3p  | 0.024                                 |
| 7  | 0.0055104 | hsa-miR-376c    |                                       |
| 8  | 0.0068214 | hsa-miR-381     | 0.008                                 |
| 9  | 0.0069619 | hsa-miR-379     | 0.006                                 |
| 10 | 0.0088893 | hsa-miR-382     | 0.012                                 |
| 11 | 0.0089245 | hsa-miR-202     | 0.012                                 |
| 12 | 0.0094433 | hsa-miR-376a    |                                       |
| 13 | 0.0095107 | hsa-miR-622     | 0.024                                 |
| 14 | 0.0111881 | hcmv-miR-US4    |                                       |
| 15 | 0.012006  | hsa-miR-337-5p  |                                       |
| 16 | 0.0122888 | hsa-let-7i*     | 0.022                                 |
| 17 | 0.0123002 | hsa-miR-493     | 0.022                                 |
| 18 | 0.0133053 | hsa-miR-7-1*    |                                       |
| 19 | 0.0134074 | hsa-miR-26b*    | 0.007                                 |
| 20 | 0.0152828 | hsa-miR-30e*    | 0.039                                 |
| 21 | 0.015382  | hsa-miR-370     |                                       |
| 22 | 0.0160487 | hsa-miR-377     |                                       |
| 23 | 0.0164153 | hsa-miR-638     |                                       |
| 24 | 0.0166334 | hsa-miR-516b    | 0.027                                 |
| 25 | 0.0167488 | hsa-miR-101     |                                       |
| 26 | 0.0169984 | hsa-miR-15b     |                                       |
| 27 | 0.0175038 | hsa-miR-99a*    | 0.01                                  |
| 28 | 0.0183306 | kshv-miR-K12-3  |                                       |
| 29 | 0.019676  | hsa-miR-373     |                                       |
| 30 | 0.0199129 | hsa-miR-550*    | 0.014                                 |
| 31 | 0.0200445 | hsa-miR-29a*    |                                       |
| 32 | 0.0202176 | hsa-miR-154     | 0.004                                 |
| 33 | 0.0202376 | hsa-miR-299-3p  |                                       |
| 34 | 0.020412  | hsa-miR-545     | 0.004                                 |
| 35 | 0.0207174 | hsv1-miR-H1     |                                       |
| 36 | 0.0209391 | hsa-miR-513a-3p |                                       |
| 37 | 0.0212815 | hsa-miR-136*    |                                       |
| 38 | 0.0221236 | hsa-miR-127-5p  |                                       |
| 39 | 0.022838  | hsa-miR-485-5p  |                                       |
| 40 | 0.0230099 | hsa-miR-410     |                                       |
| 41 | 0.0231182 | hsa-miR-588     |                                       |
| 42 | 0.0246552 | hsa-miR-98      |                                       |
| 43 | 0.0269558 | hsa-miR-942     |                                       |
| 44 | 0.0276962 | hsa-miR-149*    |                                       |
| 45 | 0.0281523 | hsa-miR-765     |                                       |
| 46 | 0.0284542 | hsa-miR-515-5p  |                                       |
| 47 | 0.0285864 | hsa-miR-186     |                                       |

|    |           |                 |       |
|----|-----------|-----------------|-------|
| 48 | 0.0293007 | hsa-miR-934     |       |
| 49 | 0.0296294 | hsa-miR-409-3p  | 0.039 |
| 50 | 0.0296519 | hsa-miR-541     |       |
| 51 | 0.0302965 | hsa-miR-518d-5p | 0.042 |
| 52 | 0.0307872 | hsa-miR-572     |       |
| 53 | 0.0314859 | hsa-miR-885-5p  | 0.028 |
| 54 | 0.0341162 | hsa-miR-508-5p  |       |
| 55 | 0.0341454 | hsa-miR-548a-3p |       |
| 56 | 0.0368284 | hsa-miR-518c*   |       |
| 57 | 0.0377861 | hsa-miR-20a*    |       |
| 58 | 0.03953   | hsa-miR-623     |       |
| 59 | 0.0398862 | hsa-miR-423-3p  | 0.012 |
| 60 | 0.0407497 | hsv1-miR-LAT    |       |
| 61 | 0.0408813 | hsa-miR-582-5p  |       |
| 62 | 0.0422933 | hsa-miR-198     |       |
| 63 | 0.044216  | hsa-miR-601     |       |
| 64 | 0.044389  | hsa-miR-496     |       |
| 65 | 0.0447085 | hsa-miR-376b    |       |
| 66 | 0.0451142 | hsa-miR-628-3p  | 0.032 |
| 67 | 0.0457228 | hsa-miR-569     |       |
| 68 | 0.0458197 | hsa-miR-487b    |       |
| 69 | 0.0464401 | hsa-miR-26a-2*  | 0.043 |
| 70 | 0.0490225 | ebv-miR-BART13  |       |
